# Supplementary material for: Silvicultural Practices for Diversity Conservation and Invasive Species Suppression in Forest Ecosystems of the Bundala National Park, Sri Lanka
Source: MDPI journal article supplement (doi:10.3390/plants13010121), 2023-12-31
Supplement: s1 [file s1]

## Supplementary Material

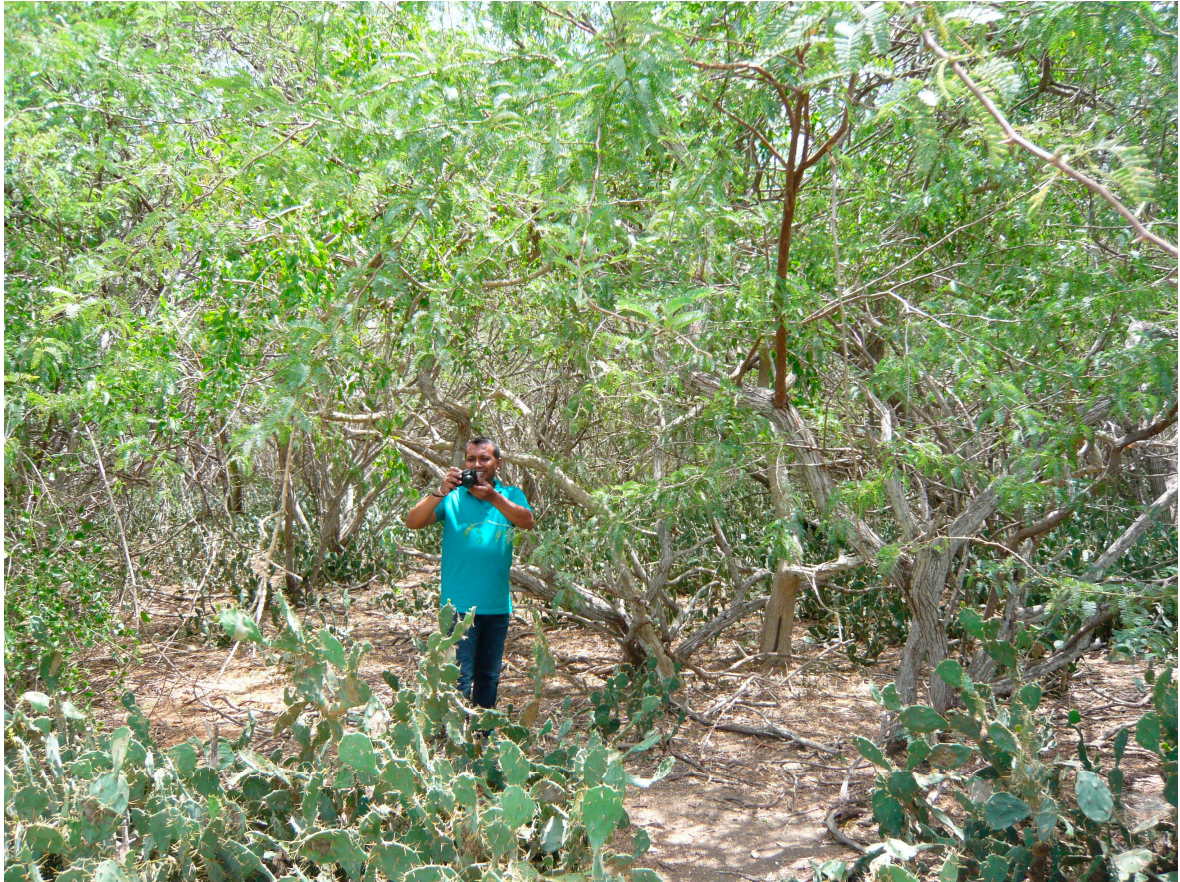

**Figure S1.** Dense bush created by IAS (invasive aliens species) *Prosopis juliflora* (Sw.) DC., and the cactus *Opuntia dillenii* (Ker-Gawl.) Haw., that suppresses the natural regeneration of indigenous species. First author of the study Channa Suraweera on photo (for scale). Photo: Josef Gallo, 2018/08/11.
